# Supplementary material for: Latest development in the synthesis of ursodeoxycholic acid (UDCA): a critical review
Source: publisher site journal article supplement (doi:10.3762/bjoc.14.33), 2018-02-20
Supplement: Additional file 1 [file 1860-5397-14-33-S1.pdf]

**Supporting Information**

**for**

**Latest development in the synthesis of**

**ursodeoxycholic acid (UDCA): a critical review**

Fabio Tonin and Isabel W. C. E. Arends\*

Address: Department of Biotechnology, Delft University of Technology, Van der  
Maasweg 9, 2629 HZ Delft, The Netherlands

Email: Isabel W.C.E. Arends - I.W.C.E.Arends@tudelft.nl

\*Corresponding author

**Supporting Figures S1 and S2**

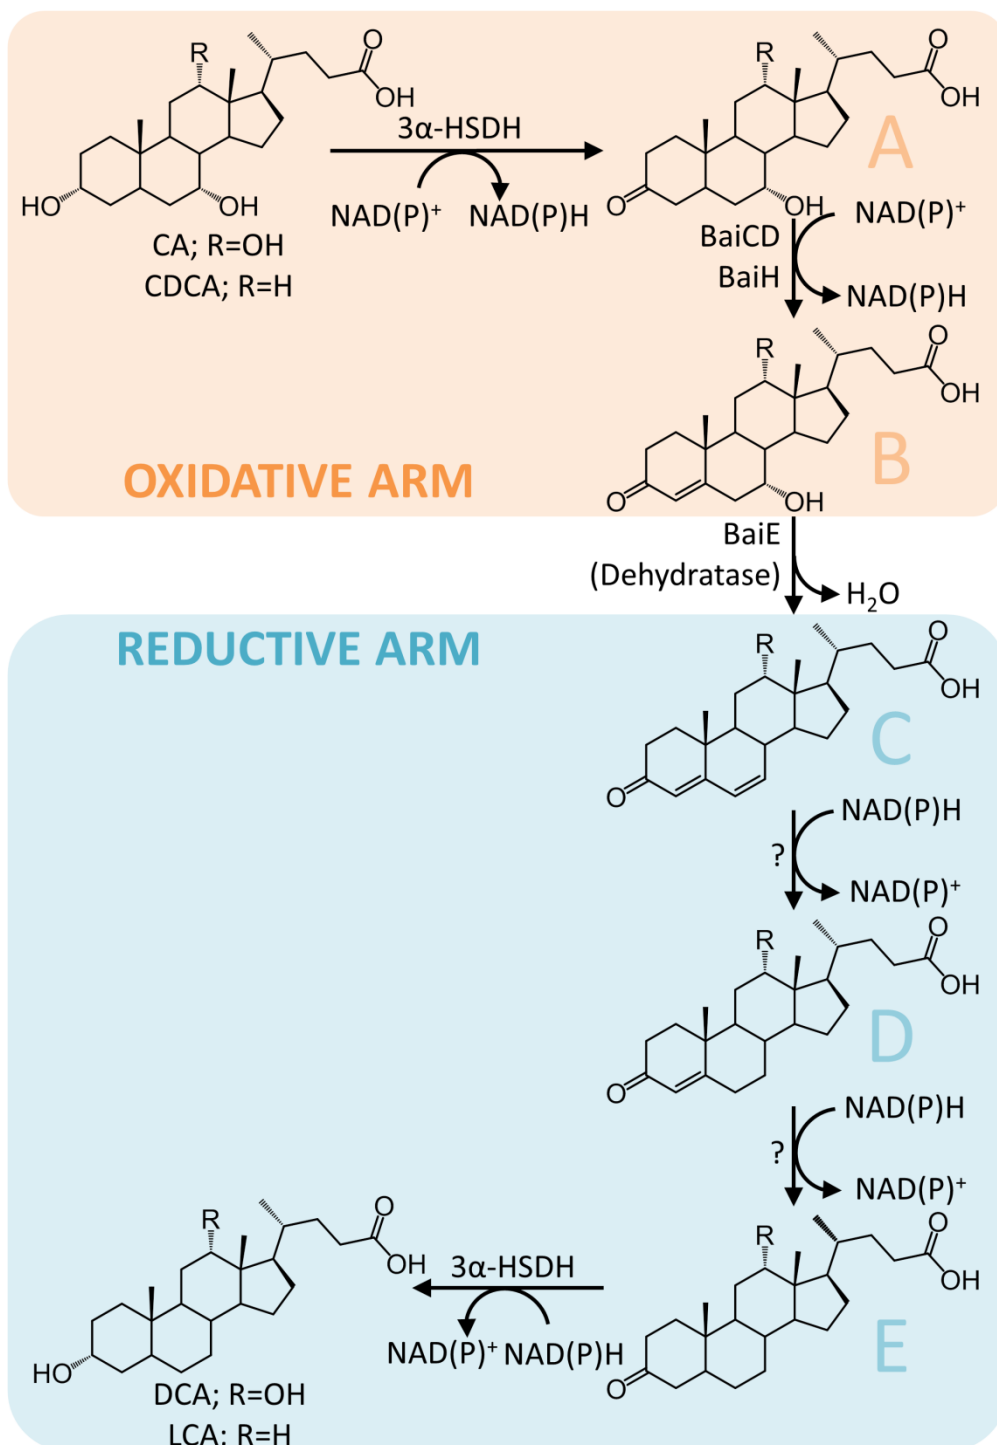

**Figure S1:** Proposed pathway involved in the synthesis of secondary bile acids. The oxidative and reductive arms are highlighted in orange and blue boxes, respectively. CA is oxidized first to (A) 3-oxo-CA and subsequently to (B) 3-oxo- $\Delta^4$ -CA. The latter compound is dehydrated by BaiE yielding (C) 3-oxo- $\Delta^{4,6}$ -DCA and furtherly reduced to (D) 3-oxo- $\Delta^4$ -DCA, (E) 3-oxo-DCA and DCA. If CDCA is employed the names of the intermediates are: (A) 3-oxo-CDCA, (B) 3-oxo- $\Delta^4$ -CDCA, (C) 3-oxo- $\Delta^{4,6}$ -LCA, (D) 3-oxo- $\Delta^4$ -LCA and (E) 3-oxo-LCA. The name of known enzymes are given; hypothetical enzymes not yet identified are marked with a question mark. The reaction from the compound D to E can be catalyzed by the same enzymes used for the oxidation (BaiCD or BaiH).

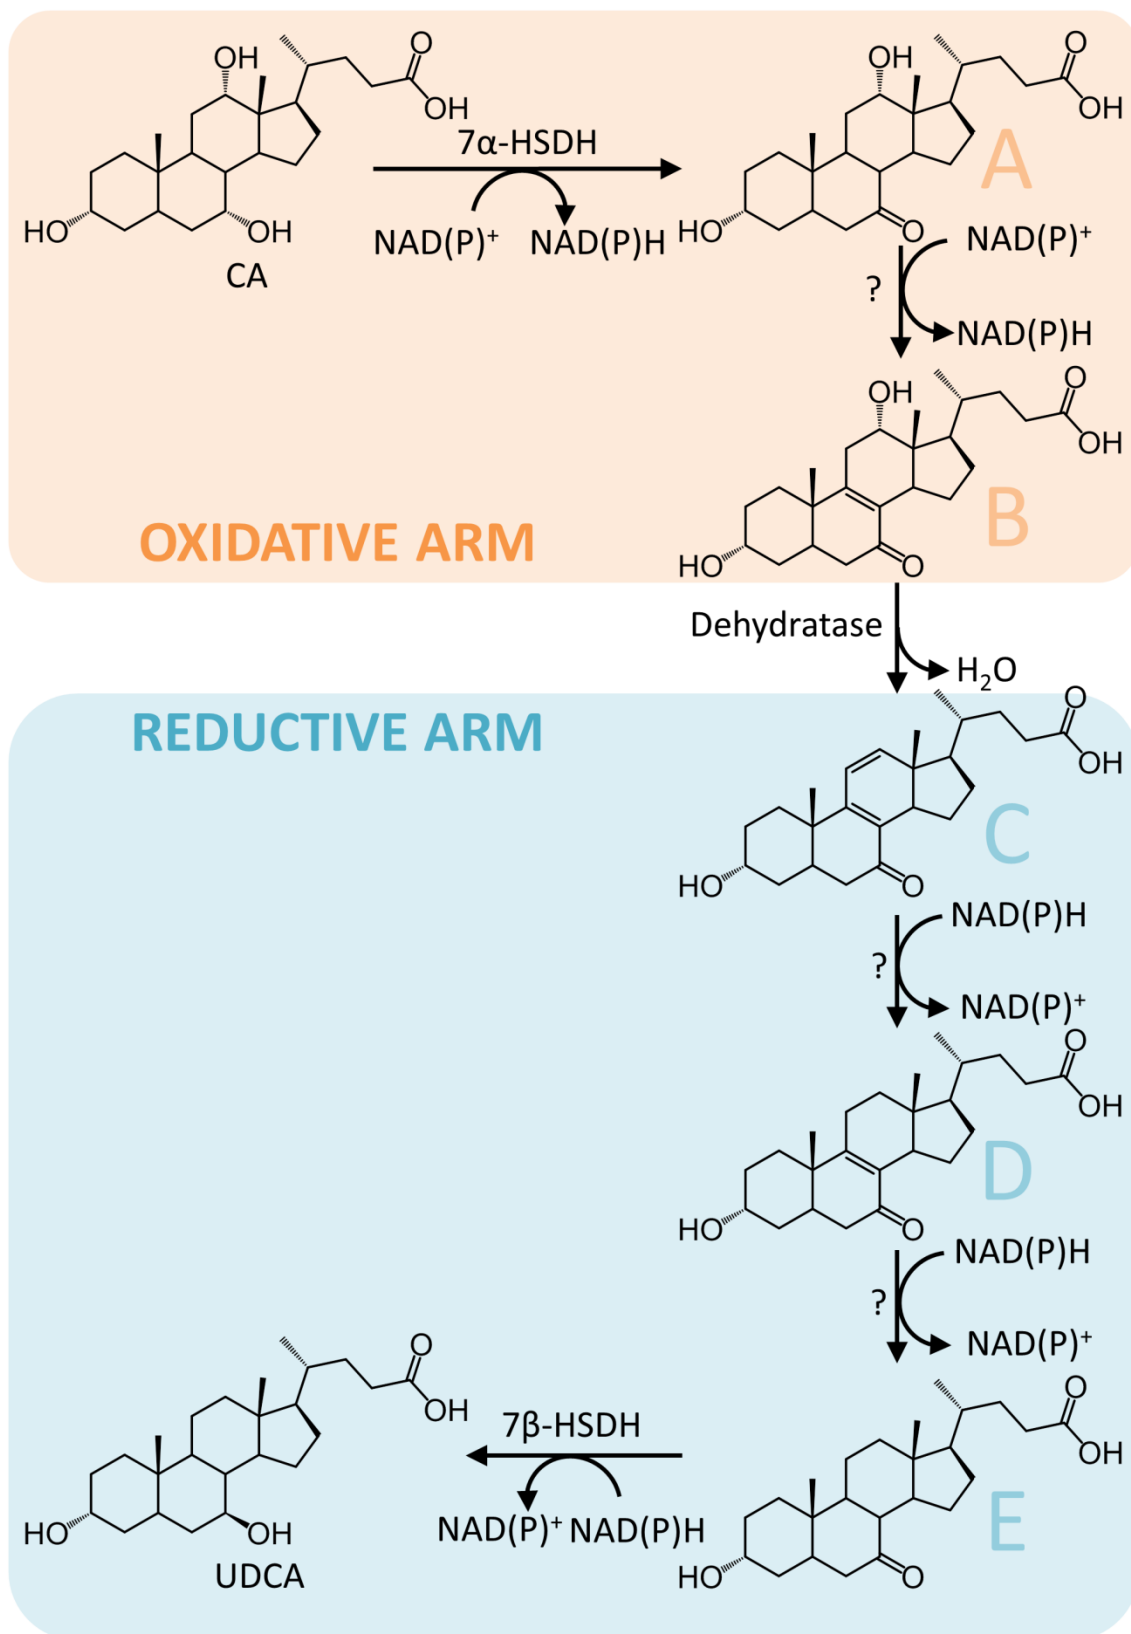

**Figure S2:** Proposed mechanism for the C-12 dehydroxylation designed by analogy to the C7 one. Also in this case, the oxidative and reductive arms are highlighted in orange and blue boxes, respectively. (A) 7-oxo-DCA, (B) 7-oxo- $\Delta^8$ -DCA, (C) 7-oxo- $\Delta^{4,11}$ -LCA, (D) 7-oxo- $\Delta^8$ -LCA and (E) 7-oxo-LCA
